# Supplementary material
Source: PubMed Central journal article supplement (PMC6998054)
Supplement: Supp_FigS1.pdf [file Supp_FigS1.pdf]

## Supplementary Data

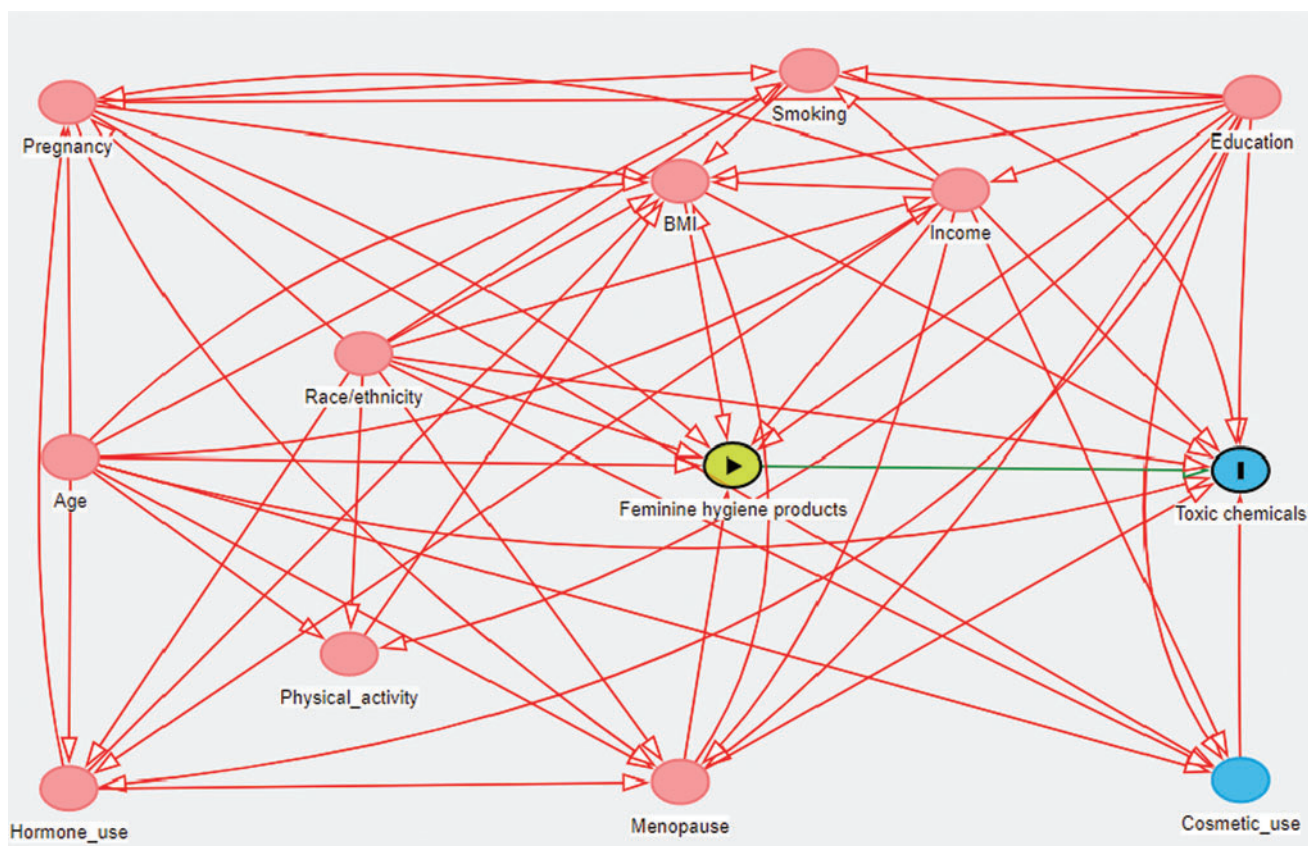

**SUPPLEMENTARY FIG. S1.** DAG for evaluation of covariate selection in the analysis of feminine product use with whole blood concentrations of VOCs. Exposure is use of feminine hygiene products. Outcome is whole blood concentration of VOCs. Factors taken into account include age, race/ethnicity, BMI, education, household income, smoking, pregnancy status, menopausal status, physical activity, use of other personal care products (*e.g.*, cosmetics), as well as hormone use. To minimize the possibility of overadjustment and maximize the study sample size and statistical power, the minimal and sufficient adjustment set contains age at interview, race/ethnicity, educational attainment, income-to-poverty ratio, BMI, pregnancy status, and menopausal status. This figure is constructed through Directed Acyclic Graph ([www.dagitty.net/dags.html](http://www.dagitty.net/dags.html)). BMI, body mass index; DAG, directed acyclic graph; VOCs, volatile organic compounds.
