# Supplementary material
Source: PubMed Central journal article supplement (PMC6998054)
Supplement: Supp_TableS1-S2.pdf [file Supp_TableS1-S2.pdf]

SUPPLEMENTARY TABLE S1. VOLATILE ORGANIC COMPOUNDS, DIOXINS/FURANS, ORGANOCHLORINE, AND ORGANOPHOSPHATE PESTICIDES EXAMINED IN THE NATIONAL HEALTH AND NUTRITION EXAMINATION SURVEY 2001–2004

| <i>Chemical groups</i>       | <i>Chemical name</i>        | <i>n</i> | <i>% &lt; LOD</i> | <i>GM</i> | <i>GSE</i> |
|------------------------------|-----------------------------|----------|-------------------|-----------|------------|
| VOCs, ng/mL<br><i>n</i> = 33 | 2,5-dimethylfuran           | 442      | 76.70             | 0.015     | 1.05       |
|                              | 1,1-dichloroethane          | 505      | 100               | NA        | NA         |
|                              | 1,2-dichlorobenzene         | 492      | 100               | NA        | NA         |
|                              | 1,1-dichloroethene          | 505      | 100               | NA        | NA         |
|                              | 1,2-dichloroethane          | 497      | 100               | NA        | NA         |
|                              | cis 1,2-dichloroethene      | 505      | 100               | NA        | NA         |
|                              | 1,1,2-trichloroethane       | 502      | 100               | NA        | NA         |
|                              | 1,2 dibromo-3-chloropropane | 432      | 100               | NA        | NA         |
|                              | trans-1,2-dichloroethene    | 505      | 100               | NA        | NA         |
|                              | 1,3-dichlorobenzene         | 491      | 100               | NA        | NA         |
|                              | tetrachloroethene           | 880      | 76.70             | 0.042     | 1.03       |
|                              | 1,1,2,2-tetrachloroethane   | 451      | 99.80             | NA        | NA         |
|                              | Bromoform, pg/mL            | 791      | 43.50             | 1.57      | 1.08       |
|                              | Bromodichloromethane        | 802      | 15.40             | 1.82      | 1.08       |
|                              | Benzene                     | 833      | 47.80             | 0.038     | 1.06       |
|                              | Chlorobenzene               | 505      | 100               | NA        | NA         |
|                              | Chloroform                  | 747      | 5.45              | 12.65     | 1.06       |
|                              | Dibromochloromethane        | 809      | 39.59             | 0.88      | 1.07       |
|                              | Carbon tetrachloride        | 794      | 96.36             | 0.004     | 1.02       |
|                              | 1,4-dichlorobenzene         | 805      | 48.53             | 0.20      | 1.08       |
|                              | Dibromomethane              | 500      | 99.56             | NA        | NA         |
|                              | 1,2-dichloropropane         | 505      | 100               | NA        | NA         |
|                              | Ethylbenzene                | 837      | 39.15             | 0.032     | 1.04       |
|                              | Hexachloroethane            | 505      | 100               | NA        | NA         |
|                              | Methylene chloride          | 431      | 99.66             | NA        | NA         |
|                              | MTBE                        | 740      | 16.53             | 11.02     | 1.20       |
|                              | Nitrobenzene                | 377      | 100               | NA        | NA         |
|                              | O-xylene                    | 894      | 64.50             | 0.041     | 1.03       |
|                              | Styrene                     | 836      | 56.13             | 0.036     | 1.05       |
|                              | Trichloroethene             | 815      | 97.75             | 0.008     | 1.01       |
| 1,1,1-trichloroethane        | 497                         | 99.71    | NA                | NA        |            |
| Toluene                      | 880                         | 5.70     | 0.12              | 1.06      |            |
| m-/p-xylene                  | 886                         | 3.00     | 0.13              | 1.06      |            |

GM (GSE) was not computable for those with detection rates <1%.

LOD, limit of detection; GM, geometric mean; GSE, geometric standard error; MTBE, methyl t-butyl ether; NA, not available; VOCs, volatile organic compounds.

SUPPLEMENTARY TABLE S2. SURVEY-WEIGHTED GEOMETRIC MEANS (GEOMETRIC STANDARD ERRORS) OF WHOLE BLOOD VOLATILE ORGANIC COMPOUND CONCENTRATIONS BY RACE/ETHNICITY AMONG U.S. WOMEN AGED 20–49 YEARS, NATIONAL HEALTH AND NUTRITION EXAMINATION SURVEY 2001–2004

| <i>Chemical groups</i>                                   | <i>White</i> | <i>Black</i> | <i>Mexican American</i> | <i>Other Hispanic</i> | <i>Others</i> | <i>p-Value<sup>a</sup></i> |
|----------------------------------------------------------|--------------|--------------|-------------------------|-----------------------|---------------|----------------------------|
| Whole blood concentrations of volatile organic compounds |              |              |                         |                       |               |                            |
| Bromodichloromethane (pg/mL)                             | 1.60 (0.14)  | 2.02 (0.24)  | 2.22 (0.34)             | 1.88 (0.40)           | 3.09 (0.61)   | 0.004                      |
| Chloroform (pg/mL)                                       | 11.35 (0.87) | 15.47 (1.61) | 12.61 (1.19)            | 15.58 (2.55)          | 16.86 (2.32)  | 0.02                       |
| Dibromochloromethane (pg/mL)                             | 0.79 (0.05)  | 0.75 (0.12)  | 1.41 (0.13)             | 0.89 (0.15)           | 1.81 (0.49)   | 0.003                      |
| 1,4-dichlorobenzene (ng/mL)                              | 0.14 (0.01)  | 0.49 (0.07)  | 0.43 (0.06)             | 0.26 (0.04)           | 0.24 (0.08)   | <0.0001                    |
| Ethylbenzene (ng/mL)                                     | 0.03 (0.002) | 0.03 (0.001) | 0.03 (0.001)            | 0.02 (0.001)          | 0.03 (0.004)  | <0.0001                    |
| Methyl t-butyl ether (pg/mL)                             | 10.20 (2.40) | 13.27 (2.78) | 14.26 (3.79)            | 7.10 (2.38)           | 11.07 (3.52)  | 0.47                       |
| Toluene (ng/mL)                                          | 0.13 (0.008) | 0.10 (0.01)  | 0.08 (0.005)            | 0.06 (0.008)          | 0.13 (0.02)   | <0.0001                    |
| m-/p-xylene (ng/mL)                                      | 0.14 (0.009) | 0.11 (0.01)  | 0.11 (0.009)            | 0.09 (0.008)          | 0.15 (0.02)   | <0.0001                    |

<sup>a</sup>*p*-Values to examine differences by racial/ethnic groups for continuous variables: F-test
