# Supplementary material
Source: PubMed Central journal article supplement (PMC6998054)
Supplement: Supp_TableS3.pdf [file Supp_TableS3.pdf]

SUPPLEMENTARY TABLE S3. COMPARISON OF QUANTILE ESTIMATES BY REVERSE KAPLAN–MEIER ESTIMATOR AND SIMPLE REPLACEMENT BY  $LOD/\sqrt{2}$ .

|                                      | <i>1,4-dichlorobenzene</i> | <i>Ethylbenzene</i> |
|--------------------------------------|----------------------------|---------------------|
| % < LOD                              | 48.5                       | 39.1                |
| Reverse KM estimator                 |                            |                     |
| 25th percentile                      | 0.09                       | 0.021               |
| Median                               | 0.13                       | 0.027               |
| 75th percentile                      | 0.46                       | 0.043               |
| Simple replacement by $LOD/\sqrt{2}$ |                            |                     |
| 25th percentile                      | 0.08                       | 0.017               |
| Median                               | 0.13                       | 0.027               |
| 75th percentile                      | 0.46                       | 0.043               |

KM, Kaplan–Meier.
